# Supplementary material
Source: PubMed Central journal article supplement (PMC1691019)
Supplement: 12065043s01.pdf [file 12065043s01.pdf]

This is an electronic appendix to the paper by Arnold & Owens (2002) Extra-pair paternity and egg dumping in birds: life history, parental care and the risk of retaliation. *Proc. R. Soc. Lond. B* **269**, 1263-1269.

Electronic appendices are refereed with the text. However, no attempt has been made to impose a uniform editorial style on the electronic appendices.

## ELECTRONIC APPENDIX A

| family       | species                        | epp  | ibp  | admort | c  | clutch | effect | male | incudur | feeddur | totdur | references                        |
|--------------|--------------------------------|------|------|--------|----|--------|--------|------|---------|---------|--------|-----------------------------------|
| Megapodiidae | <i>Alectura lathamii</i>       |      | 45.5 | 35     | 21 | 15     | 0      | 9    | 45      | 0       |        | 45 Birks (1997)                   |
| Phasianidae  | <i>Tetrao tetrix</i>           |      | 0    | 50     | 8  | 8      |        | 0    | 26      | 0       |        | 84 Alatalo <i>et al.</i> (1996)   |
| Anatidae     | <i>Lagopus lagopus</i>         | 13.2 | 0    | 35     | 8  | 8      | 47     | 0    | 22      | 0       |        | 78 Freeland <i>et al.</i> (1995)  |
|              | <i>Anser caerulescens</i>      | 13   | 4.3  | 12     | 4  | 4      | 5      | 2    | 22      | 0       |        | 67 Dunn <i>et al.</i> (1999)      |
|              | <i>Branta leucopsis</i>        | 0    | 27   | 5      | 5  | 5      | 38     | 4    | 24      | 0       |        | 66.5 Larsson <i>et al.</i> (1995) |
| Picidae      | <i>Melanerpes formicivorus</i> | 0    | 0    | 25     | 5  | 5      |        | 4    | 11      | 31      |        | 42 Dickinson <i>et al.</i> (1995) |
|              | <i>Picoides borealis</i>       | 9    | 0    | 26     | 4  | 4      |        | 4    | 10      | 26      |        | 36 Haig <i>et al.</i> (1994)      |
| Meropidae    | <i>Merops apiaster</i>         | 5.3  | 0    | 6      | 6  | 6      | 100    | 6    | 20      | 30.5    |        | 50.5 Jones <i>et al.</i> (1991)   |
| Strigidae    | <i>Otus asio</i>               | 0    | 0    | 4      | 4  | 4      | 100    | 2    | 26      | 30      |        | 56 Lawless <i>et al.</i> (1997)   |
| Rallidae     | <i>Gallinula chloropus</i>     | 0    | 47   | 33     | 14 | 7      |        | 6    | 17      | 0       |        | 42 McRae & Burke (1996)           |
|              | <i>Porphyrio porphyrio</i>     | 0    | 0    | 34.5   | 8  | 4      |        | 3    | 23      | 0       |        | 48 Jamieson <i>et al.</i> (1994)  |
| Scolopacidae | <i>Actitis macularia</i>       | 11.1 | 2.9  | 45     | 12 | 4      |        | 8    | 21      | 0       |        | 37 Oring <i>et al.</i> (1992)     |
|              | <i>Tryngites subruficollis</i> | 40.5 | 2.1  | 4      | 4  | 4      |        | 0    | 23      | 18      |        | 41 Lanctot <i>et al.</i> (1997)   |
| Jacaniidae   | <i>Jacana jacana</i>           | 3    | 0    | 8      | 8  | 4      |        | 8    | 28      | 0       |        | 28 Emlen <i>et al.</i> (1998)     |
| Charadriidae | <i>Haematopus ostralegus</i>   | 3.9  | 0    | 15.9   | 3  | 3      | 100    | 6    | 25      | 0       |        | 55 Heg <i>et al.</i> (1993)       |
|              | <i>Charadrius morinellus</i>   | 9.1  | 0    | 3      | 3  | 3      |        | 8    | 24      | 0       |        | 49 Owens <i>et al.</i> (1995)     |
|              | <i>Charadrius semipalmatus</i> | 4.2  | 0    | 4      | 4  | 4      |        | 6    | 23      | 0       |        | 49.5 Zharikov & Nol (2000)        |
| Laridae      | <i>Catharacta longbergi</i>    | 0    | 0    | 2      | 2  | 2      | 100    | 6    | 30      | 55      |        | 85 Millar <i>et al.</i> (1994)    |

|                   |                                  |      |     |      |   |     |   |    |      |                                                             |
|-------------------|----------------------------------|------|-----|------|---|-----|---|----|------|-------------------------------------------------------------|
|                   | <i>Larus occidentalis</i>        | 0    | 0   | 3    | 3 | 100 | 6 | 24 | 43   | 67 Gilbert <i>et al.</i> (1998)                             |
| Accipitridae      | <i>Buteo galapagoensis</i>       | 0    | 0   | 10   | 2 | 100 | 4 | 37 | 49   | 86 Faaborg <i>et al.</i> (1995)                             |
| Falconidae        | <i>Falco columbarius</i>         | 0    | 0   | 4    | 4 | 100 | 4 | 28 | 20   | 48 Warkentin <i>et al.</i> (1994)                           |
|                   | <i>Falco naumanni</i>            | 3.9  | 7.4 | 4    | 4 | 100 | 2 | 28 | 15   | 43 Negro <i>et al.</i> (1996)                               |
|                   | <i>Falco sparverius</i>          | 9.5  | 0   | 5    | 5 | 88  | 4 | 29 | 29   | 58 Villarroel & Kuhnlein (1998)                             |
|                   | <i>Falco tinnunculus</i>         | 2.7  | 0   | 35   | 5 | 100 | 4 | 28 | 29.5 | 57.5 Korpimäki <i>et al.</i> (1996)                         |
| Phalacrocoracidae | <i>Phalacrocorax aristotelis</i> | 12.6 | 6.7 | 16   | 3 | 100 | 6 | 30 | 53   | 83 Graves <i>et al.</i> (1993)                              |
| Ciconiidae        | <i>Coragyps astratus</i>         | 0    | 0   | 2    | 2 | 100 | 6 | 32 | 70   | 102 Decker <i>et al.</i> (1993)                             |
| Spheniscidae      | <i>Eudyptes schlegeli</i>        | 0.1  | 0   | 14   | 2 | 100 | 4 | 35 | 65   | 100 St Clair <i>et al.</i> (1995)                           |
| Gaviidae          | <i>Gavia immer</i>               | 0    | 0   | 2    | 2 | 100 | 6 | 29 | 42   | 71 Piper <i>et al.</i> (1997)                               |
| Procellariidae    | <i>Fulmarus glacialis</i>        | 0    | 0   | 5.5  | 1 | 100 | 6 | 52 | 46   | 98 Hunter <i>et al.</i> (1992)                              |
|                   | <i>Puffinus diomedea</i>         | 0    | 0   | 5    | 1 | 100 | 6 | 54 | 90   | 144 Swatschek <i>et al.</i> (1994)                          |
|                   | <i>Puffinus tenuirostris</i>     | 10.8 | 0   | 1    | 1 | 100 | 6 | 52 | 59   | 111 Austin & Parkin (1996)                                  |
| Tyrannidae        | <i>Oceanodroma leucorhoa</i>     | 0    | 0   | 12   | 1 | 100 | 7 | 41 | 63   | 104 Mauck <i>et al.</i> (1995)                              |
| Maluridae         | <i>Sayornis phoebe</i>           | 20   |     | 10   | 5 |     | 4 | 16 | 16   | 32 Conrad <i>et al.</i> (1998)                              |
|                   | <i>Malurus cyanus</i>            | 95   | 0   | 31   | 6 | 3   | 2 | 14 | 10   | Mulder <i>et al.</i> (1994);<br>24 Double & Cockburn (2000) |
| Meliphagidae      | <i>Manorina melanophrys</i>      | 7.7  | 0   | 36.6 | 6 | 3   | 1 | 14 | 15   | 29 Conrad <i>et al.</i> (1998)                              |
|                   | <i>Manorina melanocephala</i>    | 5.7  | 0   | 37.2 | 6 | 3   | 2 | 15 | 14   | 29 Poldmaa <i>et al.</i> (1995)                             |
| Eopsaltridae      | <i>Petroica australis</i>        | 0    | 0   | 20   | 6 | 3   | 4 | 18 | 18   | 36 Ardem <i>et al.</i> (1997)                               |
| Laniidae          | <i>Lanius vittatus</i>           | 16.7 | 0   | 12   | 6 | 6   | 4 | 14 | 14   | 28 Yamagishi <i>et al.</i> (1992)                           |
|                   | <i>Lanius collurio</i>           | 16.7 | 0   | 61   | 5 | 5   | 2 | 14 | 14   | 28 Fomasari <i>et al.</i> (1994)                            |
| Vireonidae        | <i>Vireo olivaceus</i>           | 57.1 | 0   | 4    | 4 | 4   | 2 | 11 | 12   | 23 Morton <i>et al.</i> (1998)                              |
|                   | <i>Vireo solitarius</i>          | 6.3  | 0   | 45   | 8 | 4   | 6 | 15 | 13   | 28 Morton <i>et al.</i> (1998)                              |
| Corvidae          | <i>Aphelocoma coerulescens</i>   | 0    | 0   | 24   | 3 | 3   | 4 | 16 | 17   | 33 Quinn <i>et al.</i> (1999)                               |
|                   | <i>Corvus monedula</i>           | 6.7  | 0   | 43   | 5 | 100 | 4 | 18 | 33   | 51 Henderson <i>et al.</i> (2000)                           |
| Muscipidae        | <i>Turdus grayi</i>              | 52.6 | 0   | 6    | 3 | 3   | 4 | 12 | 15.5 | 27.5 Stutchbury <i>et al.</i> (1998)                        |

|              |                                 |      |      |      |    |      |      |    |                                                                                                                                                                                                     |
|--------------|---------------------------------|------|------|------|----|------|------|----|-----------------------------------------------------------------------------------------------------------------------------------------------------------------------------------------------------|
|              | <i>Erithacus svecicus</i>       | 50.7 | 0    | 6    | 6  | 2    | 13   | 14 | Krokene <i>et al.</i> (1996);<br>27 Questiau <i>et al.</i> (1999)                                                                                                                                   |
|              | <i>Ficedula albicollis</i>      | 32.9 | 0    | 56   | 6  | 36.4 | 2    | 15 | 27 Sheldon & Ellergren (1999)<br>Gelter & Teigelström (1992);<br>27 Ellergren <i>et al.</i> (1995)                                                                                                  |
|              | <i>Ficedula hypoleuca</i>       | 11.9 | 0    | 53   | 6  | 18   | 2    | 14 | 28 Currie <i>et al.</i> (1998, 1999)                                                                                                                                                                |
|              | <i>Oenanthe oenanthe</i>        |      | 0    | 12   | 6  |      | 2    | 15 | 33 Dickinson & Akre (1998)<br>Pinxten <i>et al.</i> (1993);                                                                                                                                         |
|              | <i>Sialia mexicana</i>          | 45   |      | 55.1 | 10 | 5    | 2    | 20 | 33 Smith & von Schantz (1993)                                                                                                                                                                       |
| Sturnidae    | <i>Sturnus vulgaris</i>         | 28.6 | 7.1  | 52   | 10 | 5    | 40   | 21 | 36 Haydock <i>et al.</i> (1996)                                                                                                                                                                     |
|              | <i>Campylorhynchus griseus</i>  |      | 0    | 6    | 3  |      | 2    | 17 | 36 Rabenoid <i>et al.</i> (1990)                                                                                                                                                                    |
| Certhidae    | <i>Campylorhynchus nuchalis</i> | 4.6  | 0    | 6    | 3  |      | 2    | 17 | 25 Soukup & Thompson (1997)                                                                                                                                                                         |
|              | <i>Troglodytes aedon</i>        | 26.7 | 0    | 70.9 | 12 | 6    | 26.5 | 12 | 31.5 Lubjuhn <i>et al.</i> (1999)                                                                                                                                                                   |
| Paridae      | <i>Parus ater</i>               | 75   |      | 67   | 9  | 9    | 4    | 15 | Gullberg <i>et al.</i> (1992);<br>Kempenaers <i>et al.</i> (1997);                                                                                                                                  |
|              | <i>Parus caeruleus</i>          | 40.2 | 0    | 58.7 | .5 | 9    | 43   | 19 | 33 Krokene <i>et al.</i> (1998)                                                                                                                                                                     |
|              | <i>Parus cristatus</i>          | 30   | 0    | 73   | 6  | 6    | 4    | 21 | 37 Lens <i>et al.</i> (1997)<br>Gullberg <i>et al.</i> (1992);<br>Krokene <i>et al.</i> (1998);<br>Verboven & Mateman (1997);<br>Strohbach <i>et al.</i> (1998);<br>33 Lubjuhn <i>et al.</i> (1999) |
|              | <i>Parus major</i>              | 31   | 2.4  | 56.1 | 11 | 11   | 39   | 19 | 30 Orell <i>et al.</i> (1997)                                                                                                                                                                       |
|              | <i>Parus montanus</i>           | 4.2  | 0    | 43.5 | 8  | 8    | 4    | 13 | 22 Hoi & Hoi-Leitner (1997)                                                                                                                                                                         |
|              | <i>Panurus biarmicus</i>        | 29.5 | 20.6 | 57   | 12 | 6    | 6    | 10 | 28 Otter <i>et al.</i> (1998)                                                                                                                                                                       |
|              | <i>Parus atricapillus</i>       | 29.3 | 5.2  | 60   | 7  | 7    | 4    | 12 | 36 Schleicher <i>et al.</i> (1997)                                                                                                                                                                  |
|              | <i>Remiz pendulinus</i>         | 17.3 | 7.6  | 8    | 8  | 4    | 3    | 14 | 26 Bruce <i>et al.</i> (1996)<br>Liffeld <i>et al.</i> (1993);                                                                                                                                      |
| Aegithalidae | <i>Psaltriparus minimus</i>     | 0    | 0    | 12   | 6  | 6    | 6    | 12 | 30 Barber <i>et al.</i> (1996)                                                                                                                                                                      |
| Hirundinidae | <i>Tachycineta bicolor</i>      | 62.9 | 0    | 60.2 | 5  | 5    | 4.3  | 16 | 41 Wagner <i>et al.</i> (1996)                                                                                                                                                                      |
|              | <i>Progne subis</i>             | 18.3 |      | 56.9 | 4  | 4    | 4    | 15 | 37 Alves & Bryant (1998)                                                                                                                                                                            |
|              | <i>Riparia riparia</i>          | 36   | 13   | 65   | 10 | 5    | 6    | 14 |                                                                                                                                                                                                     |

|              |                                   |      |     |    |    |     |    |    |    |                                                                                                                                                                                                |
|--------------|-----------------------------------|------|-----|----|----|-----|----|----|----|------------------------------------------------------------------------------------------------------------------------------------------------------------------------------------------------|
|              | <i>Hirundo rustica</i>            | 0    | 63  | 10 | 5  | 8.3 | 4  | 15 | 20 | Primmer <i>et al.</i> (1995);<br>35 Møller & Tegelström (1997)<br>Riley <i>et al.</i> (1995);                                                                                                  |
| Zosteropidae | <i>Delichon urbica</i>            | 33.3 | 0   | 62 | 8  | 4   | 6  | 15 | 27 | 42 Whittingham & Liffield (1995)                                                                                                                                                               |
| Sylviidae    | <i>Zosterops lateralis</i>        | 0    | 0   | 8  | 6  | 3   | 6  | 12 | 12 | 24 Robertson <i>et al.</i> (2001)                                                                                                                                                              |
|              | <i>Acrocephalus arundinaceus</i>  | 0    | 0   | 5  | 5  | 14  | 2  | 14 | 13 | Hasselquist <i>et al.</i> (1996);<br>27 Leisler <i>et al.</i> (2000)                                                                                                                           |
|              | <i>Acrocephalus palaudicola</i>   | 50   | 0   | 10 | 5  | 5   | 0  | 12 | 13 | 25 Schulze-Hagen <i>et al.</i> (1993)                                                                                                                                                          |
|              | <i>Acrocephalus schoenobaenus</i> | 0    | 0   | 50 | 5  | 5   | 2  | 13 | 13 | Lanfegors <i>et al.</i> (1998);<br>26 Buchanan & Catchpole (2000)                                                                                                                              |
|              | <i>Phylloscopus sibilatrix</i>    | 0    | 0   | 6  | 6  | 6   | 2  | 13 | 12 | 25 Gyllensten <i>et al.</i> (1990)<br>Björnstad & Liffield (1997);<br>Gyllensten <i>et al.</i> (1990);                                                                                         |
|              | <i>Phylloscopus trochilus</i>     | 0    | 0   | 67 | 6  | 6   | 2  | 13 | 13 | 26 Fridolfsson <i>et al.</i> (1997)                                                                                                                                                            |
| Nectaridae   | <i>Turdoides caudatus</i>         | 0    | 2.3 | 8  | 4  | 4   | 3  | 14 | 14 | 28 Lundy <i>et al.</i> (1998)                                                                                                                                                                  |
| Passeridae   | <i>Nectarinia osea</i>            | 36   | 5   | 3  | 60 | 2   | 2  | 14 | 16 | 29 Zilberman <i>et al.</i> (1999)<br>Wetton & Parkin (1991);<br>Cordero <i>et al.</i> (1999);<br>Griffith <i>et al.</i> (1999);<br>Whitekiller <i>et al.</i> (2000);<br>25 Veiga & Boto (2000) |
|              | <i>Passer domesticus</i>          | 19.9 | 0   | 55 | 10 | 5   | 6  | 11 | 14 | 26 Reyer <i>et al.</i> (1997)                                                                                                                                                                  |
|              | <i>Anthus spinoletta</i>          | 12.4 | 1.9 | 12 | 6  | 6   | 2  | 12 | 14 | 30 Hartley <i>et al.</i> (1995)                                                                                                                                                                |
|              | <i>Prunella collaris</i>          | 0    | 0   | 6  | 3  | 3   | 1  | 14 | 16 | 24 Burke & Bruford (1989)                                                                                                                                                                      |
|              | <i>Prunella modularis</i>         | 2.2  | 0   | 40 | 10 | 5   | 2  | 13 | 11 | 25 Birkhead <i>et al.</i> (1990)                                                                                                                                                               |
| Fringillidae | <i>Taeniopygia guttata</i>        | 12.5 | 36  | 15 | 5  | 0   | 6  | 13 | 12 | 27 Sheldon & Burke (1994)                                                                                                                                                                      |
|              | <i>Fringilla coelebs</i>          | 23.1 | 0   | 37 | 4  | 0   | 2  | 13 | 14 | 28 Hill <i>et al.</i> (1994)                                                                                                                                                                   |
|              | <i>Carpodacus mexicanus</i>       | 14.3 | 0   | 47 | 8  | 4   | 2  | 13 | 15 | 25 Sundberg & Dixon (1996)                                                                                                                                                                     |
|              | <i>Emberiza citrinella</i>        | 68.8 | 0   | 47 | 8  | 4   | 2  | 13 | 12 | 24 Dixon <i>et al.</i> (1994)                                                                                                                                                                  |
|              | <i>Emberiza schoeniclus</i>       | 86.2 | 0   | 43 | 5  | 5   | 27 | 13 | 11 | 24 Briskie <i>et al.</i> (1998)                                                                                                                                                                |
|              | <i>Calcarius pictus</i>           | 3.2  | 0   | 4  | 4  | 4   | 1  | 12 | 12 |                                                                                                                                                                                                |

|                                  |      |      |      |    |    |   |    |      |      |                                  |
|----------------------------------|------|------|------|----|----|---|----|------|------|----------------------------------|
| <i>Passerculus sandwichensis</i> | 40   | 51.5 | 5    | 5  | 19 | 2 | 12 | 14   | 26   | Freeman-Gallant (1996)           |
| <i>Wilsonia citrina</i>          | 35.3 | 1.7  | 45.3 | 6  | 3  | 2 | 12 | 9    | 21   | Stutchbury <i>et al.</i> (1997)  |
| <i>Geospiza conirostris</i>      | 15.2 | 0    | 18   | 6  | 3  | 4 | 12 | 14.5 | 26.5 | Petren <i>et al.</i> (1999)      |
| <i>Cardinalis cardinalis</i>     | 15.8 | 0    | 6    | 6  | 3  | 2 | 12 | 11   | 23   | Ritchison <i>et al.</i> (1994)   |
| <i>Passerina cyanea</i>          | 48   | 0    | 52.4 | 6  | 3  | 0 | 12 | 11   | 23   | Westneat (1990)                  |
|                                  |      |      |      |    |    |   |    |      |      | Westneat (1993);                 |
| <i>Agelaius phoeniceus</i>       | 41.2 | 0    | 46   | 8  | 4  | 2 | 11 | 10   | 21   | Gray (1997)                      |
| <i>Carduelis tristis</i>         | 26.7 | 0    | 56   | 10 | 5  | 4 | 12 | 11   | 23   | Gissing <i>et al.</i> (1998)     |
| <i>Emberiza calandra</i>         | 6.7  | 0    | 42   | 5  | 5  | 2 | 12 | 9    | 21   | Hartley <i>et al.</i> (1993)     |
| <i>Icterus galbula</i>           | 46   | 1    | 8    | 8  | 4  | 4 | 13 | 13   | 26   | Richardson & Burke (1999)        |
| <i>Serinus serinus</i>           | 14.9 | 4.3  | 40   | 8  | 4  | 2 | 13 | 15   | 28   | Hoi-Leitner <i>et al.</i> (1999) |

## KEY TO APPENDIX (SEE TEXT FOR FURTHER DETAILS)

### Column

### Description

|         |                                                                |
|---------|----------------------------------------------------------------|
| family  | Taxonomic family name                                          |
| species | Taxonomic species name                                         |
| epp     | Rate of extra-pair paternity (EPP) in terms of % of broods     |
| ibp     | Rate of intraspecific brood parasitism in terms of % of broods |
| admort  | Rate of adult mortality per annum                              |
| fec     | Rate of female fecundity per annum                             |
| effect  | Effect of male care on fledging success                        |
| male    | Male contribution to parental care                             |
| incdur  | Duration of incubation period                                  |



- Conrad KF, Clarke MF, Robertson RJ, Boag PT (1998) Paternity and the relatedness of helpers in the cooperatively breeding bell miner *The Condor* 100, 343-349.
- Cordero PJ, Wetton JH, Parkin DT (1998) Extra-pair paternity and male badge size in the house sparrow *Journal of Avian Biology* 30, 97-102.
- Currie DR, Burke T, Whitney RL, Thompson DBA (1998) Male and female behaviour and extra-pair paternity in the wheatear *Animal Behaviour* 55, 689-703.
- Currie D, Krupa AP, Burke T, Thompson DBA (1999) The effect of experimental male removals on extrapair paternity in the wheatear, *Oenanthe oenanthe* *Animal Behaviour* 57, 145-152.
- Decker MD, Parker PG, Minchella DJ, Rabenold KN (1993) Monogamy in black vultures: genetic evidence from DNA fingerprinting *Behavioral Ecology* 4, 29-35.
- Dickinson J, Haydock J, Koenig W, Stanback M, Pitelka F (1995) Genetic monogamy in single-male groups of acorn woodpeckers, *Melanerpes formicivorus* *Molecular Ecology* 4, 765-769.
- Dickinson JL (1998) Extrapair paternity, inclusive fitness, and within-group benefits of helping in western bluebirds *Molecular Ecology* 7, 95-105.
- Dixon A, Ross D, O' Malley SLC, Burke T (1994) Paternal investment inversely related to degree of extra-pair paternity in the reed bunting *Nature* 371, 698-700.
- Double M, Cockburn A (2000) Pre-dawn infidelity: females control extra-pair mating in superb fairy-wrens *Proceedings of the Royal Society, London, Series B* 267, 465-470.
- Dunn P, Afton A, Gloutney M, Alisauskas R (1999) Forced copulation results in few extrapair fertilizations in Ross's and lesser snow geese *Animal Behaviour* 57, 1071-1081.
- Ellegren H, Lifjeld JT, Slagsvold T, Primmer CR (1995) Handicapped males and extrapair paternity in pied flycatchers: a study using microsatellite markers *Molecular Ecology* 4, 739-744.
- Emlen S, Wrege P, Webster M (1998) Cuckoldry as a cost of polyandry in the sex-role-reversed wattled jacana, *Jacana jacana* *Proceedings of the Royal Society, London, Series B* 265, 2359-2364.
- Faaborg J, Parker PG, DeLay L, de Vries T, Bednarz JC, Paz SM, Naranjo J, Waite TA (1995) Confirmation of cooperative polyandry in the Galapagos hawk (*Buteo galapagoensis*) *Behavioral Ecology and Sociobiology* 36, 83-90.
- Fornasari L, Bottoni L, Sacchi N, Massa R (1994) Home range overlapping and socio-sexual relationships in the red-backed shrike *Lanius collurio* *Ethology Ecology and Evolution* 6, 169-177.
- Freeland JR, Hannon SJ, Dobush G, Boag PT (1995) Extra-pair paternity in willow ptarmigan broods: measuring costs of polygyny to males *Behavioral Ecology and Sociobiology* 36, 349-355.
- Freeman-Gallant CR (1996) DNA fingerprinting reveals female preference for male parental care in Savannah sparrows *Proceedings of the Royal Society, London, Series B* 263, 157-160.
- Fridolfsson A, Gyllenstein UB, Jakobsson S (1997) Microsatellite markers for paternity testing in the willow warbler *Phylloscopus trochilus*: high frequency of extra-pair young in an island population *Hereditas* 126, 127-132.
- Gelter HP, Tegelström H (1992) High frequency of extra-pair paternity in Swedish pied flycatchers revealed by allozyme electrophoresis and DNA fingerprinting *Behavioral Ecology and Sociobiology* 31, 1-7.
- Gilbert L, Burke T, Krupa A (1998) No evidence for extra-pair paternity in the western gull *Molecular Ecology* 7, 1549-1552.

- Gissing G, Crease T, Middleton A (1998) Extrajoint paternity associated with reneating in the American Goldfinch *The Auk* 115, 230-234.
- Graves J, Ortega-Ruano J, Slater P (1993) Extra-pair copulations and paternity in shags: do females choose better males? *Proceedings of the Royal Society, London, Series B* 253, 3-7.
- Gray EM (1997) Female red-winged blackbirds accrue material benefits from copulating with extra-pair males *Animal Behaviour* 53, 625-639.
- Griffith SC, Stewart IRK, Dawson DA, Owens IPF, Burke T (1999) Contrasting levels of extra-pair paternity in mainland and island populations of the house sparrow (*Passer domesticus*): is there an 'island effect'? *B. J. Lin. Soc.* 68, 303-316.
- Gullberg A, Tegelström H, Gelter HP (1992) DNA fingerprinting reveals multiple paternity in families of great and blue tits (*Parus major* and *P. caeruleus*) *Hereditas* 117, 103-108.
- Gyllenstein UB, Jakobsson S, Temrin H (1990) No evidence for illegitimate young in monogamous and polygynous warblers *Nature* 343, 168-170.
- Haig S, Walters J, Plissner J (1994) Genetic-evidence for monogamy in the cooperatively breeding red-cockaded woodpecker *Behavioral Ecology and Sociobiology* 34, 295-303.
- Hartley IR, Shepherd M, Robson T, Burke T (1993) Reproductive success of polygynous male corn buntings (*Miliaria calandra*) as confirmed by DNA fingerprinting *Behavioral Ecology* 4, 310-317.
- Hartley IR, Davies NB, Hatchwell BJ, Desrochers A, Nebel D, Burke T (1995) The polyandrous mating system of the alpine accentor, *Prunella collaris*. II. Multiple paternity and parental effort *Animal Behaviour* 49, 789-803.
- Hasselquist D, Bensch S, von Schantz T (1996) Correlation between male song repertoire, extra-pair paternity and offspring survival in the great reed warbler *Nature* 381, 229-232.
- Haydock J, Parker PG, Rabenold KN (1996) Extra-pair paternity uncommon in the cooperatively breeding bicolor wren *Behavioral Ecology and Sociobiology* 38, 1-16.
- Heg D, Ens B, Burke T, Jenkins L, Kruijt J (1993) Why does the typically monogamous oystercatcher (*Haematopus ostralegus*) engage in extra-pair copulations? *Behavior* 126, 247-289.
- Henderson IG, Hart PJB, Burke T (2000) Strict monogamy in a semi-colonial passerine: the jackdaw *Corvus monedula* *Journal of Avian Biology* 31, 177-182.
- Hill GE, Montgomerie R, Roeder C, Boag P (1994) Sexual selection and cuckoldry in a monogamous songbird: implications for sexual selection theory *Behavioral Ecology and Sociobiology* 35, 193-199
- Hoi H, Hoi-Leitner M (1997) An alternative route to coloniality in the bearded tit: females pursue extra-pair fertilizations *Behavioral Ecology* 8, 113-119.
- Hoi-Leitner M, Hoi H, Romero-Pujante M, Valera F (1999) Female extra-pair behaviour and environmental quality in the serin (*Serinus serinus*): a test of the 'constrained female hypothesis' *Proceedings of the Royal Society, London, Series B* 266, 1021-1026.
- Hunter FM, Burke T, Watts SE (1992) Frequent copulation as a method of paternity assurance in the northern fulmar *Animal Behaviour* 44, 149-156.
- Jamieson IG, Quinn JS, Rose PA, White BN (1994) Shared paternity among non-relatives is a result of an egalitarian mating system in a communally breeding bird, the pukeko *Proceedings of the Royal Society, London, Series B* 257, 271-277.
- Jones, CS, Lessells, CM & Krebs JR (1991) Helpers-at-the-nest in European bee-eaters (*Merops apiaster*): a genetic analysis. In: *DNA Fingerprinting: Approaches and Applications* (Ed. T Burke, G Dolf, AJ Jeffreys & R Wolff), pp. 169-192. Basel: Birkhauser.
- Kempnaers B, Verheyen GR, Dhondt AA (1997) Extrajoint paternity in the blue tit (*Parus caeruleus*): female choice, male characteristics, and offspring quality *Behavioral Ecology* 8, 481-492.



- Korpimäki E, Lahti K, May CA, Parkin DT, Powell GB, Tolonen P, Wetton JH (1996) Copulatory behaviour and paternity determined by DNA fingerprinting in kestrels: effects of cyclic food abundance *Animal Behaviour* 51, 945-955.
- Krokene C, Anthonisen K, Lifjeld JT, Amundsen T (1996) Paternity and paternity assurance behaviour in the bluethroat, *Luscinia svecica* *Animal Behaviour* 52, 405-417.
- Krokene C, Riggstad K, Dale M, Lifjeld JT (1998) The function of extra-pair paternity in blue tits and great tits: good genes or fertility insurance? *Behavioral Ecology* 9, 649-656.
- Lancot RB, Scibner KT, Kempenaers B, Weatherhead PJ (1997) Lekking without a paradox in the buff-breasted sandpiper *The American Naturalist* 149, 1051-1070.
- Langefors A, Hasselquist D, von Schantz T (1998) Extra-pair fertilizations in the Sedge Warbler *Journal of Avian Biology* 29, 134-144.
- Larsson K, Tegelström H, Forslund P (1995) Intraspecific nest parasitism and adoption of young in the barnacle goose: effects on survival and reproductive performance *Animal Behaviour* 50, 1349-1360.
- Lawless S, Ritchison G, Klatt P, Westneat D (1997) The mating strategies of Eastern Screech-Owls: A genetic analysis *The Condor* 99, 213-217.
- Leister B, Beter J, Staudter H, Wink M (2000) Variation in extra-pair paternity in the polygynous Great Reed Warbler (*Acrocephalus arundinaceus*) *Journal of Ornithology* 141, 77-84.
- Lens L, van Dongen S, van den Broeck M, van Broeckhoven C, Dhondt AA (1997) Why female crested tits copulate repeatedly with the same partner: evidence for the mate assessment hypothesis *Behavioral Ecology* 8, 87-91.
- Lifjeld JT, Dunn PO, Robertson RJ, Boag PT (1993) Extra-pair paternity in monogamous tree swallows *Animal Behaviour* 45, 213-229.
- Lubjuhn T, Strohbach S, Brun J, Gerken T, Epplen J (1999) Extra-pair paternity in great tits (*Parus major*) - A long term study *Behaviour* 136, 1157-1172.
- Lubjuhn T, Gerken T, Brün J, Epplen JT (1999) High frequency of extra-pair paternity in the coal tit *Journal of Avian Biology* 30, 229-233.
- Lundy KJ, Parker PG, Zahavi A (1998) Reproduction by subordinates in cooperatively breeding Arabian babblers is uncommon but predictable *Behavioral Ecology and Sociobiology* 43, 173-180.
- Mauck RA, Waite TA, Parker PG (1995) Monogamy in Leach's storm-petrel: DNA fingerprinting evidence *The Auk* 112, 473-482.
- McRae S, Burke T (1996) Intraspecific brood parasitism in the moorhen: Parentage and parasite-host relationships determined by DNA fingerprinting *Behavioral Ecology and Sociobiology* 38, 115-129.
- Millar C, Anthony I, Lambert D, Stapleton P, Bergmann C, Bellamy A, Young E (1994) Patterns of reproductive success determined by DNA fingerprinting in a communally breeding oceanic bird *Biological Journal of the Linnean Society* 52, 31-48.
- Morton ES, Stutchbury BJM, Howlett JS, Piper WH (1998) Genetic monogamy in blue-headed vireos and a comparison with a sympatric vireo with extra-pair paternity *Behavioral Ecology* 9, 515-524.
- Møller AP, Tegelström H (1997) Extra-pair paternity and tail ornamentation in the barn swallow *Behavioral Ecology and Sociobiology* 41, 353-360.
- Mulder RA, Dunn PO, Cockburn RA, Lazenby-Cohen KA, Howell MJ (1994) Helpers liberate female fairy-wrens from constraints on extra-pair mate choice *Proceedings of the Royal Society, London, Series B* 255, 223-229.

- Negro J, Villarroel M, Tella J, Kuhnlein U, Hiraldo F, Donazar J, Bird D (1996) DNA fingerprinting reveals a low incidence of extra-pair fertilizations in the lesser kestrel *Animal Behaviour* 51, 935-943.
- Orell M, Rytönen S, Launonen V, Welling P, Koivula K, Kumpulainen K, Bachmann L (1997) Low frequency extra-pair paternity in the willow tit *Parus montanus* as revealed by DNA fingerprinting *IBIS* 139, 562-566.
- Oring L, Fleischer R, Reed J, Marsden K (1992) Cuckoldry through stored sperm in the sequentially polyandrous spotted sandpiper *Nature* 359, 631-633.
- Otter K, Ratcliffe L, Michaud D, Boag PT (1998) Do female Black-capped chickadees prefer high-ranking males as extra-pair partners? *Behavioral Ecology and Sociobiology* 43, 25-36.
- Owens IPF, Dixon A, Burke T (1995) Strategic paternity assurance in the sex-role reversed Eurasian dotterel (*Chandrius morinellus*): behavioral and genetic evidence *Behavioral Ecology* 6, 14-21.
- Petren K, Grant BR, Grant PR (1999) Low extrapair paternity in the cactus finch (*Geospiza scandens*) *The Auk* 116, 252-256.
- Pinxten R, Hanoite O, Eens M, Verheyen RF, Dhondt AA, Burke T (1993) Extra-pair paternity and intraspecific brood parasitism in the European starling, *Sturnus vulgaris*: evidence from DNA fingerprinting *Animal Behaviour* 45, 795-809.
- Piper WH, Evers DC, Meyer MW, Tishler KB, Kaplan JD, Fleischer RC (1997) Genetic monogamy in the common loon (*Gavia immer*) *Behavioral Ecology and Sociobiology* 41, 25-31.
- Pöldmaa T, Montgomerie R, Boag P (1995) Mating system of the cooperatively breeding noisy miner *Manorina melanocephala*, as revealed by DNA profiling *Behavioral Ecology and Sociobiology* 37, 137-143.
- Primmer CR, Møller AP, Ellegren H (1995) Resolving genetic relationships with microsatellite markers: a parentage testing system for the swallow *Hirundo rustica* *Molecular Ecology* 4, 493-498.
- Questiau S, Eybert M-C, Taberlet P (1999) Amplified fragment length polymorphism (AFLP) markers reveal extra-parentage in a bird species: the bluethroat (*Luscinia svecica*) *Molecular Ecology* 8, 1331-1339.
- Quinn J, Woolfenden G, Fitzpatrick J, White B (1999) Multi-locus DNA fingerprinting supports genetic monogamy in Florida scrub-jays *Behavioral Ecology and Sociobiology* 45, 1-10.
- Rabenold P, Rabenold K, Piper W, Haydock J, Zaack S (1990) Shared paternity revealed by genetic analysis in cooperatively breeding tropical wrens *Nature* 348, 538-540.
- Reyer H, Bollmann K, Schläpfer AR, Schymaid A, Klecack G (1997) Ecological determinants of extrapair fertilizations and egg dumping in Alpine water pipits (*Anthus spinoletta*) *Behavioral Ecology* 8, 534-543.
- Richardson DS, Burke T (1999) Extra-pair paternity in relation to male age in Bullock's orioles *Molecular Ecology* 8, 2115-2126.
- Riley HT, Bryant DM, Carter RE, Parkin DT (1995) Extra-pair fertilizations and paternity defence in house martins, *delichon urbica* *Animal Behaviour* 49, 495-509.
- Ritchison G, Klatt PH (1994) Mate guarding and extra-pair paternity in northern cardinals *The Condor* 96, 1055-1063.

- Robertson BC, Degnan S, Kikkawa J & Moritz CM (2001) Genetic monogamy in the absence of paternity guards: the Capricorn silveryeye *Zosterops lateralis chlorocephala*, on Heron Island. *Behavioural Ecology* 12, 666-673.
- Schleicher B, Hoi H, Valera F, Hoi-Leitner M (1997) The importance of different paternity guards in the polygynandrous penduline tit (*Remiz pendulinus*) *Behaviour* 134, 941-959.
- Schulze-Hagen K, Swatschek I, Dyrz A, Wink M (1993) Multiple paternity in broods of aquatic warblers *Acrocephalus paludicola*: first results of a DNA fingerprinting study *Journal of Ornithology* 134, 145-154.
- Sheldon BC, Burke T (1994) Copulation behavior and paternity in the chaffinch *Behavioral Ecology and Sociobiology* 34, 149-156.
- Sheldon BC, Ellegren H (1999) Sexual selection resulting from extra-pair paternity in collared flycatchers *Animal Behaviour* 57, 285-298.
- Smith HG, von Schantz T (1993) Extra-pair paternity in the European starling: the effect of polygyny *The Condor* 95, 1006-1015.
- Soukup S, Thompson C (1997) Social mating system affects the frequency of extra-pair paternity in house wrens *Animal Behaviour* 54, 1089-1105.
- St Clair CC, Waas JR, St Clair RC, Boag PT (1995) Unfit mothers? Maternal infanticide in royal penguins *Animal Behaviour* 50, 1177-1185.
- Strohbach S, Curio E, Bathen A, Epplen JT, Lubjuhn T (1998) Extrapair paternity in the great tit (*Parus major*): a test of the "good genes" hypothesis *Behavioral Ecology* 9, 388-396.
- Stutchbury BJM, Piper WH, Neudorf DL, Tarof SA, Rhymer JM, Fuller G, Fleischer RC (1997) Correlates of extra-pair fertilization success in hooded warblers *Behavioral Ecology and Sociobiology* 40, 119-126.
- Stutchbury BJM, Morton ES, Piper WH (1998) Extra-pair mating system of a synchronously breeding tropical songbird *Journal of Avian Biology* 29, 72-78.
- Sundberg J, Dixon A (1996) Old, colourful male yellowhammers, *Emberiza citrinella*, benefit from extra-pair copulations *Animal Behaviour* 52, 113-122.
- Swatschek I, Ristow D, Wink M (1994) Mate fidelity and parentage in Cory's shearwater *Calonectris diomedea* - field studies and DNA fingerprinting *Molecular Ecology* 3, 259-262.
- Veiga JP, Boto L (2000) Low frequency of extra-pair fertilisations in house sparrows breeding at high density *Journal of Avian Biology* 31, 237-244.
- Verboven N, Mateman AC (1997) Low frequency of extra-pair fertilizations in the great tit *Parus major* revealed by DNA fingerprinting *Journal of Avian Biology* 28, 231-239.
- Villarroel M, Bird D, Kuhnlein U (1998) Copulatory behaviour and paternity in the American kestrel: the adaptive significance of frequent copulations *Animal Behaviour* 56, 289-299.
- Wagner RH, Schug MD (1996) Condition-dependent control of paternity by female purple martins: implications for coloniality *Behavioral Ecology and Sociobiology* 38, 379-389.
- Warkentin IG, Curzon AD, Carter RE, Wetton JH, James PC, Oliphant LW, Parkin DT (1994) No evidence for extrapair fertilizations in the merlin revealed by DNA fingerprinting *Molecular Ecology* 3, 229-234.
- Weatherhead PJ, Boag PT (1995) Pair and extra-pair mating success relative to male quality in red-winged blackbirds *Behavioral Ecology and Sociobiology* 37, 81-91.
- Westneat DF (1990) Genetic parentage in the indigo bunting: a study using DNA fingerprinting *Behavioral Ecology and Sociobiology* 27, 67-76.

- Westneat DF (1993) Polygyny and extrapair fertilizations in eastern red-winged blackbirds (*Agelaius phoeniceus*) Behavioral Ecology 4, 49-59.
- Wetton JH, Parkin DT (1991) An association between fertility and cuckoldry in the house sparrow, *Passer domesticus* Proceedings of the Royal Society, London, Series B 245, 227-233.
- Whitekiller RR, Westneat DF, Schwagmeyer PL, Mock DW (2000) Badge size and extra-pair fertilizations in the house sparrow The Condor 102, 342-348.
- Whittingham LA, Liffeld JT (1995) Extra-pair fertilizations increase the opportunity for sexual selection in the monogamous House Martin *Delichon urbica* Journal of Avian Biology 26, 283-288.
- Yamagishi S, Nishiumi I, Shimoda C (1992) Extra-pair fertilization in monogamous bull-headed shrikes revealed by DNA fingerprinting The Auk 109, 711-721.
- Zharikov Y, Nol E (2000) Copulation behavior, mate guarding, and paternity in the Semipalmated Plover The Condor 102, 231-235.
- Zilberman R, Moav B, Y. Y-T (1999) Extra-pair paternity in the socially monogamous orange-tufted sunbird (*Nectarinia Osea osea*) Israel Journal of Zoology 45, 407-421.
